# Supplementary material for: Supersensitive CeOx-based nanocomposite sensor for the electrochemical detection of hydroxyl free radicals
Source: Royal Society of Chemistry journal article supplement (doi:10.1039/d1nr00015b), 2021-01-01
Supplement: d1nr00015b1.pdf [file d1nr00015b1.pdf]

## **Supplementary Information**

### **Supersensitive CeO<sub>x</sub>-Based Nanocomposite Sensor for the Electrochemical Detection of Hydroxyl Free Radicals**

Surachet Duanghathaipornsuk<sup>a</sup>, Dong-Shik Kim<sup>a</sup>, Tamara L. Phares<sup>b</sup>, Cheng-Han Li<sup>c</sup>, Joerg  
Jinschek<sup>c</sup>, and Ana C. Alba-Rubio<sup>a\*</sup>

<sup>a</sup> Department of Chemical Engineering, The University of Toledo, Toledo, OH 43606, USA

<sup>b</sup> Department of Bioengineering, The University of Toledo, Toledo, OH 43606, USA

<sup>c</sup> Department of Materials Science and Engineering, The Ohio State University, Columbus, OH 43210,  
USA

\*Corresponding author, Email: [ana.albarubio@utoledo.edu](mailto:ana.albarubio@utoledo.edu)

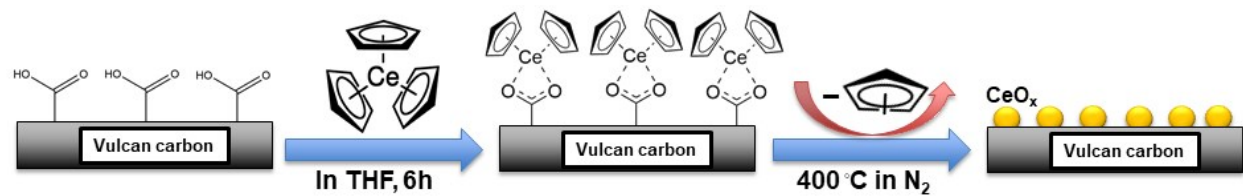

**Fig. S1.** Schematic of the synthesis of  $\text{CeO}_x$  nanoclusters/Carbon composites by Surface Organometallic Chemistry (SOMC).

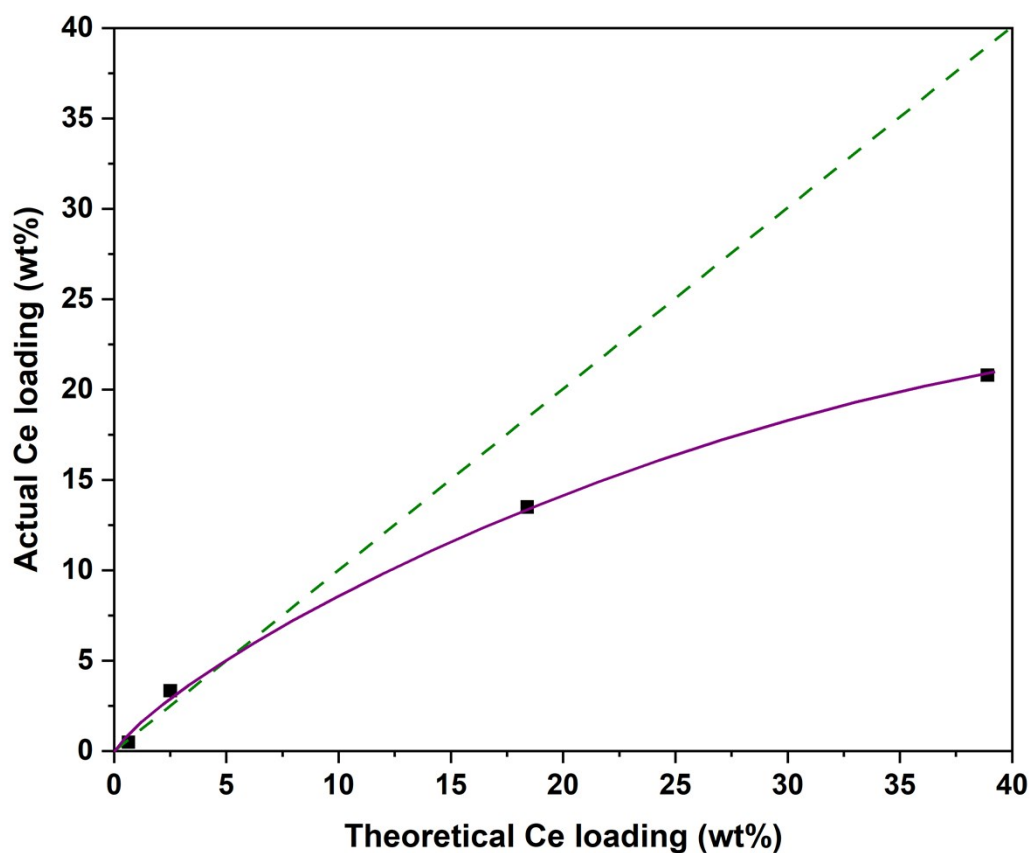

**Fig. S2.** Theoretical vs actual Ce loading and deviation from a linear correlation at higher loadings.

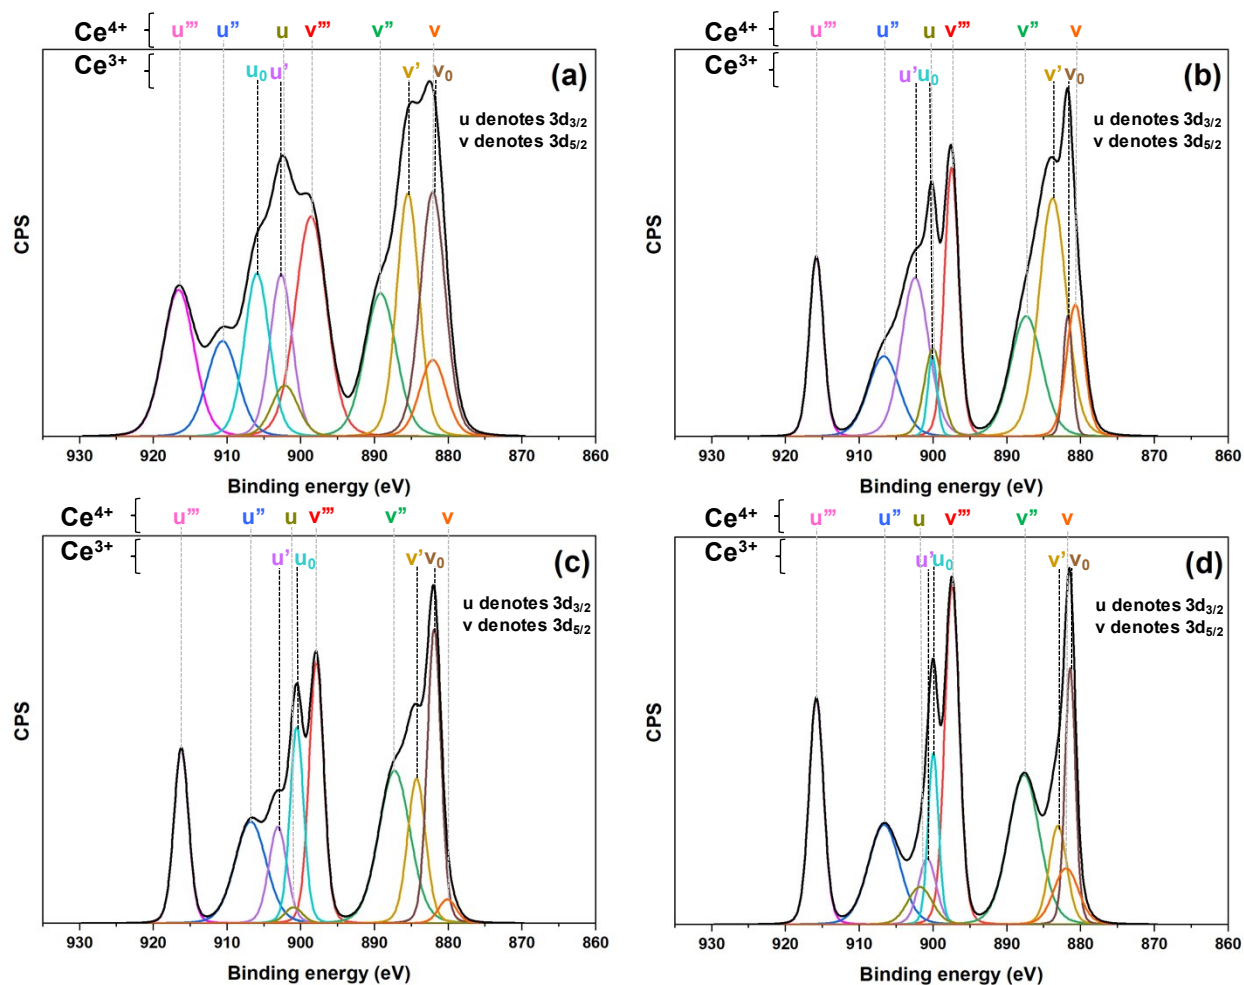

**Fig. S3.** Deconvolution of the XPS spectra for (a) 0.64, (b) 2.5, (c) 18.4, and (d) 38.9 wt% Ce/Carbon composites.

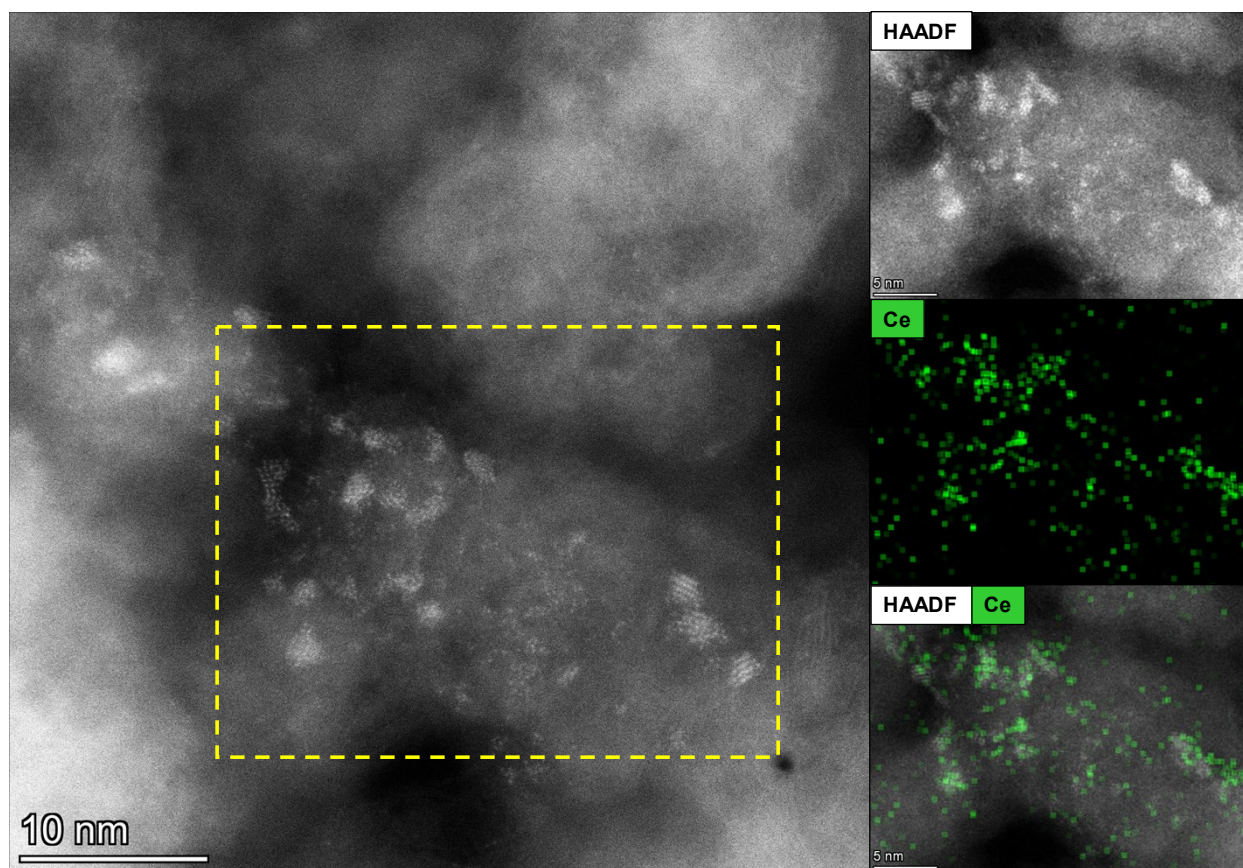

**Fig. S4.** EDS elemental mapping that shows the CeO<sub>x</sub> dispersion over the carbon support on the 0.64 wt% Ce/Carbon composite.

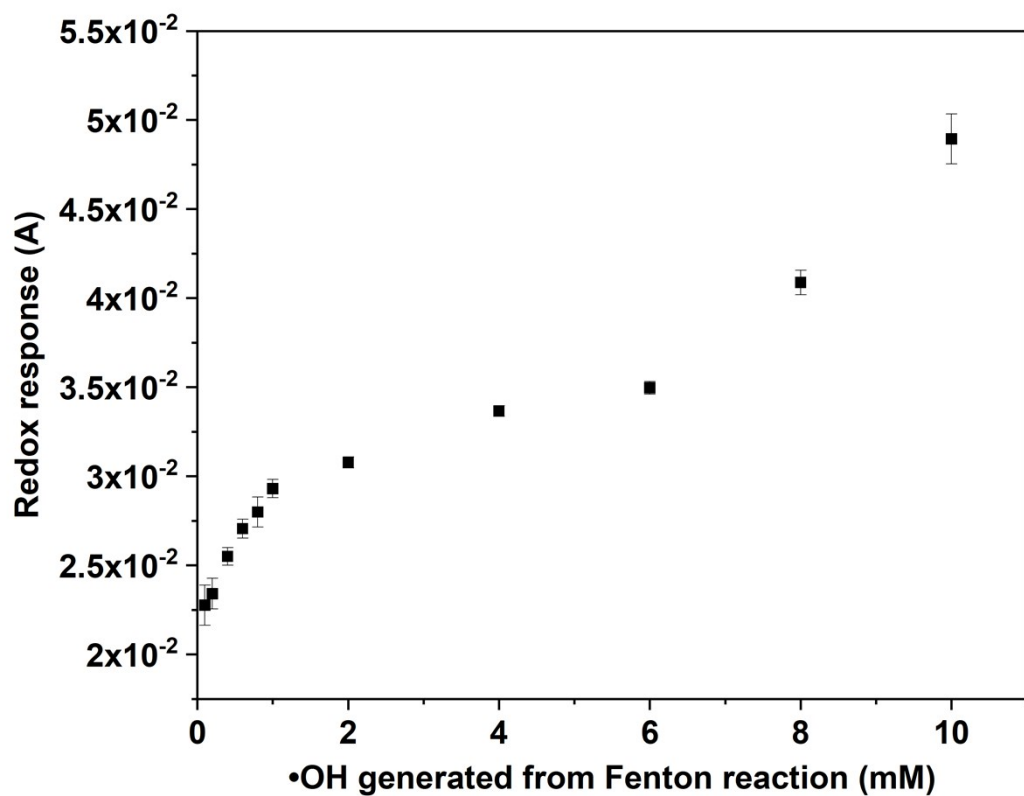

**Fig. S5.** Relationship between the sensor response and the concentration of  $\bullet\text{OH}$  generated from the Fenton reaction with the 0.64 wt% Ce/Carbon composite-modified electrode. The error bars represent the standard deviation of three repetitive measurements.

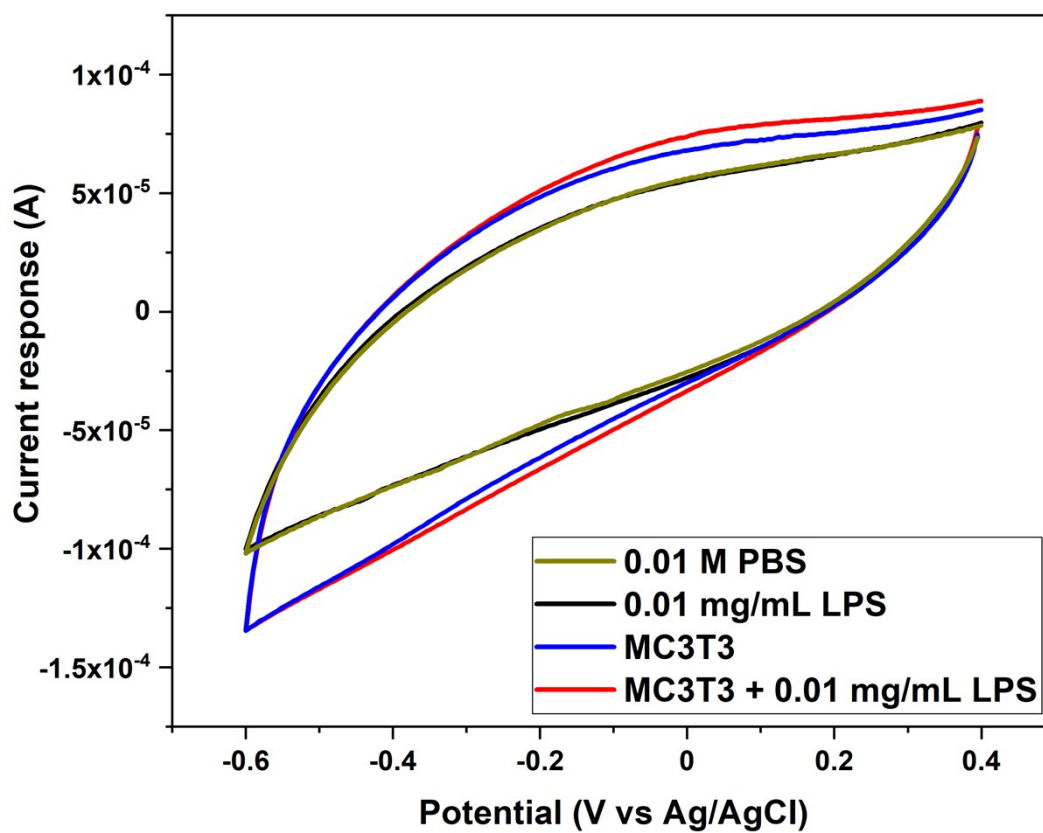

**Fig. S6.** CV results of the sensor response to PBS, LPS, MC3T3, and MC3T3 + LPS (additional induced oxidative stress) with the 0.64 wt% Ce/Carbon composite.
